# Supplementary material for: Rio1 mediates ATP-dependent final maturation of 40S ribosomal subunits
Source: PubMed Central journal article supplement (PMC4231747; doi:10.1093/nar/gku878), 2014-10-07

## SUPPLEMENTAL INFORMATION

Supplementary Table and Figure Legends

### Supplementary Table S1: Yeast strains use in these analyses

### Supplementary Table S2: Proteomic analyses of gel filtration column fractions

The table lists proteomic hits identified from column fractions 1-5 from samples coprecipitated with Rio1, Rio2, Pno1 and Nob1. Proteins in the table are filtered down to 1% FDR level and sorted by values obtained from spectral counting and quantification of the exponentially modified protein abundance index (emPAI) (see (Arike and Peil, 2014)). This provides approximate, label-free quantification of relative protein abundances. Data from these tables were used to prepare the graphs shown in Figure 5.

### Supplementary Figure S1: Kinase reaction with [ $\gamma^{32}\text{P}$ ] labeled ATP.

Comparison of phosphorylation of biogenesis factors by endogenous kinases activities associated with pre-40S particles isolated with Rio1-HTP, Rio2-HTP, Nob1-HTP and Dim2-HTP. Pre-rRNA cleavage in the isolated pre-40S particles was stimulated by addition of 5mM  $\text{Mn}^{2+}$  ions and [ $\gamma^{32}\text{P}$ ] ATP. Proteins were separated by SDS-PAGE, transferred and followed by autoradiography of membranes. The prominent band arising from Hrr25 phosphorylation activity {Ferreira-Cerca, 2012 #3563} is indicated.

### Supplementary Figure S2: Primer extension analysis of rRNA in gel filtration fractions.

A: Outline of the primer extension scheme used. To detect 20S pre-rRNA, the primer was located with the ITS1 region, adjacent to a long tract without cytosine residues. The reaction mixture contained dATP, dCTP and dTTP, together with ddGTP. Under these conditions, primer PE001 gives a defined product for 20S pre-rRNA.

B: Gel filtration plots with fractions analyzed in C indicated.

C: Primer extension analyses of the 5' ends of 18S and 25S rRNA and 20S of pre-rRNA.

### Supplementary Figure S3: Pre-40S rRNA binding sites identified for Nob1, Pno1 and Rio1

A: Mapped reads for Rio1-HTP (green) and Rio2-HTP (black) {Granneman, 2010 #2706}, on the 20S pre-rRNA secondary structure.

B: Mapped reads for Nob1-HTP (blue) and Pno1-HTP (orange) *in vivo* on the 20S pre-rRNA secondary structure



Fig. S2

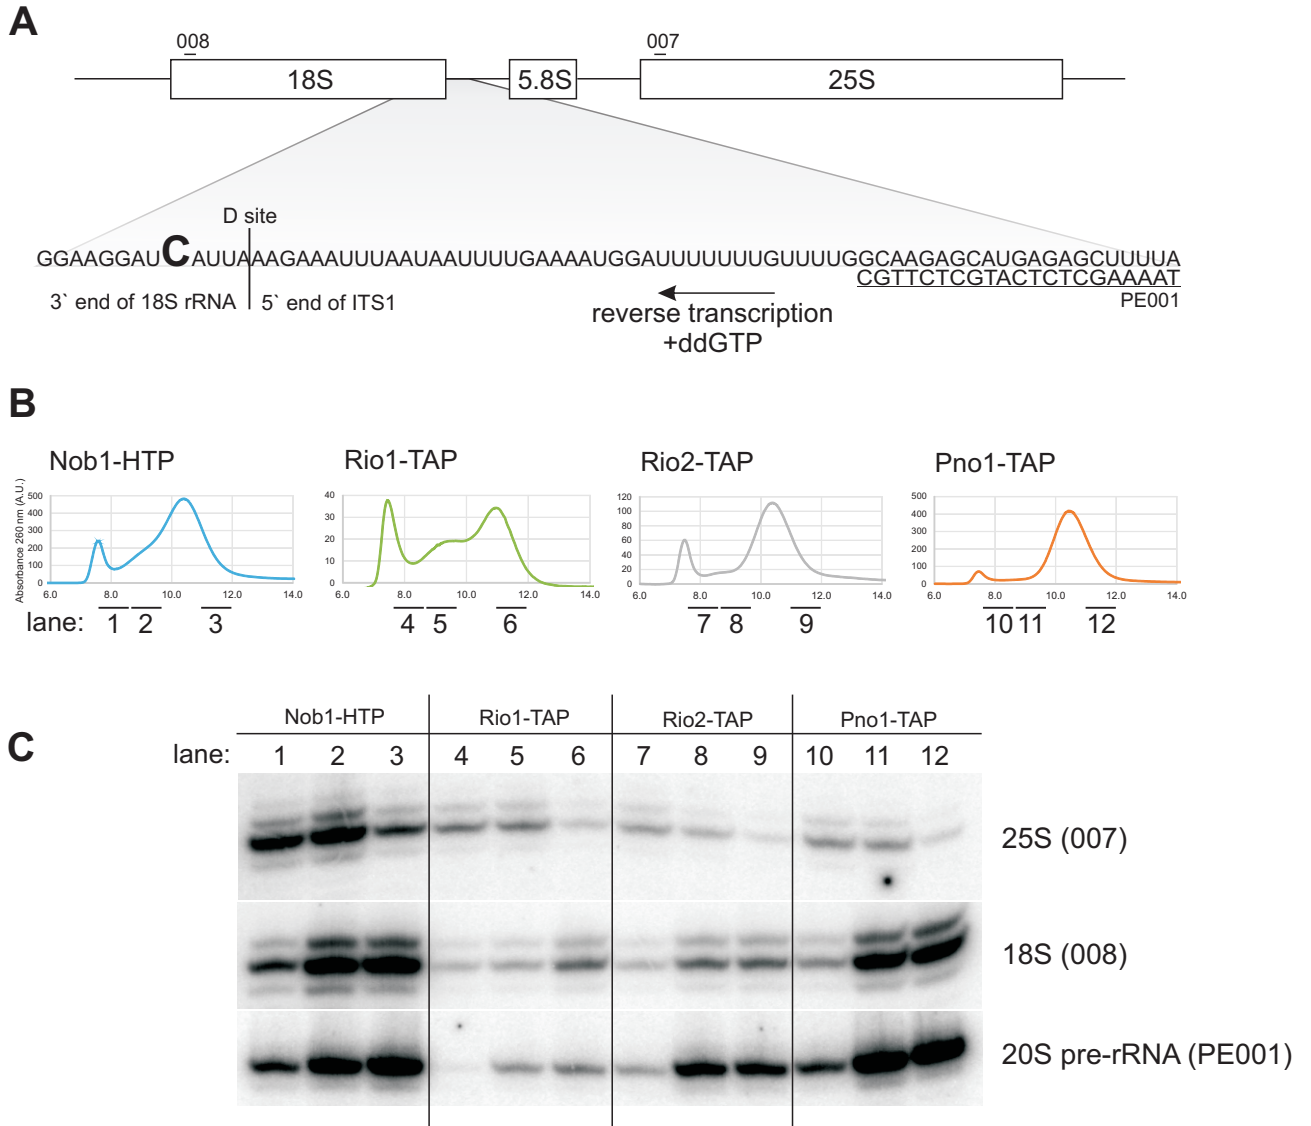

Fig. S3A

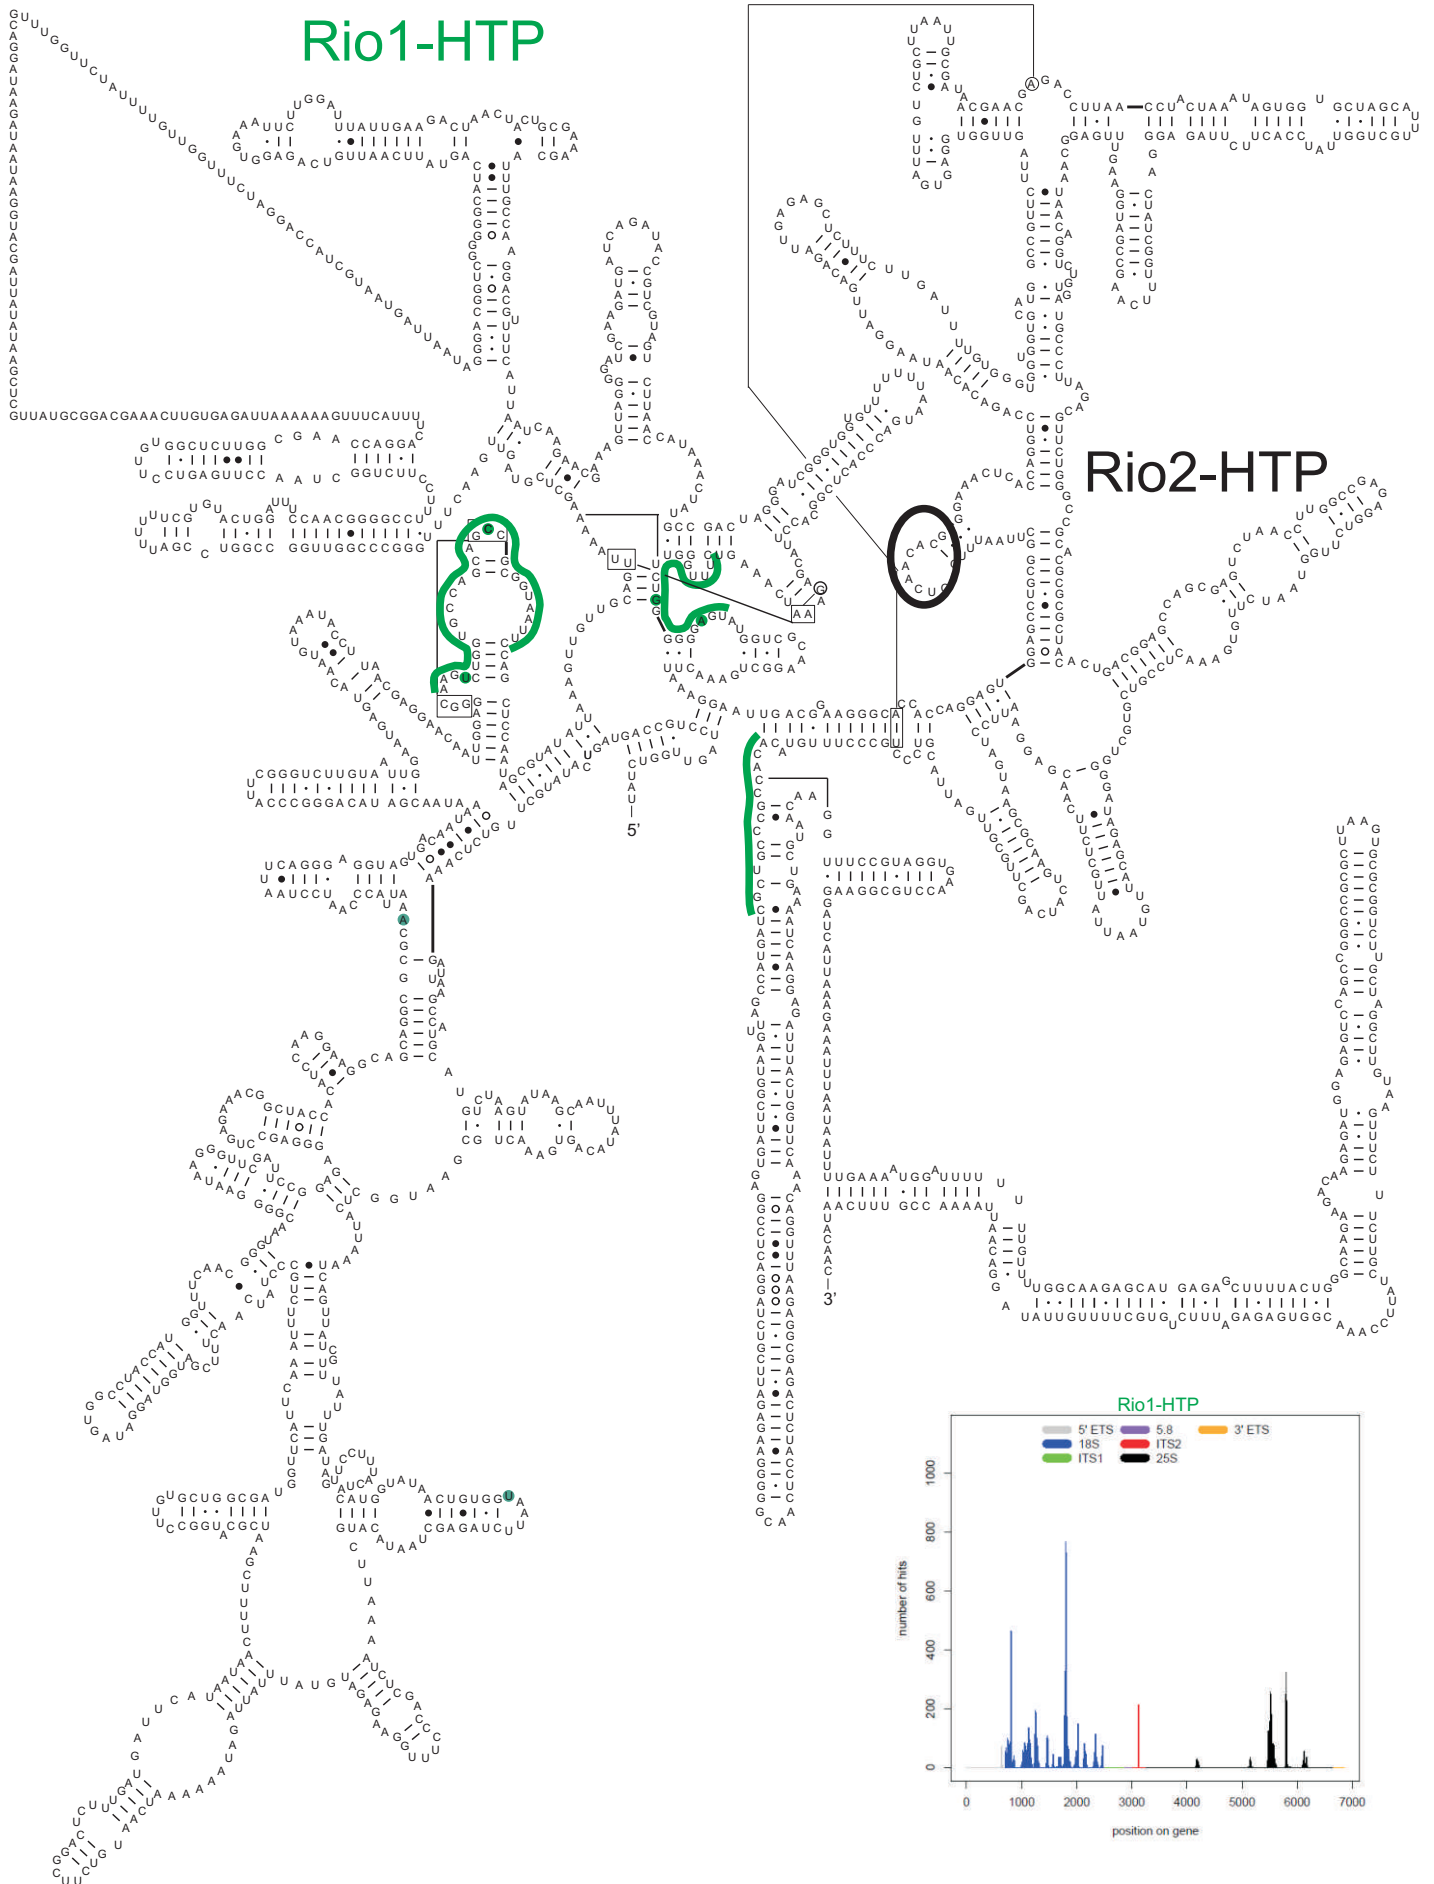

Fig. S3B

Pno1-HTP

Nob1-HTP

- binding sites
- (lighter = fewer reads)

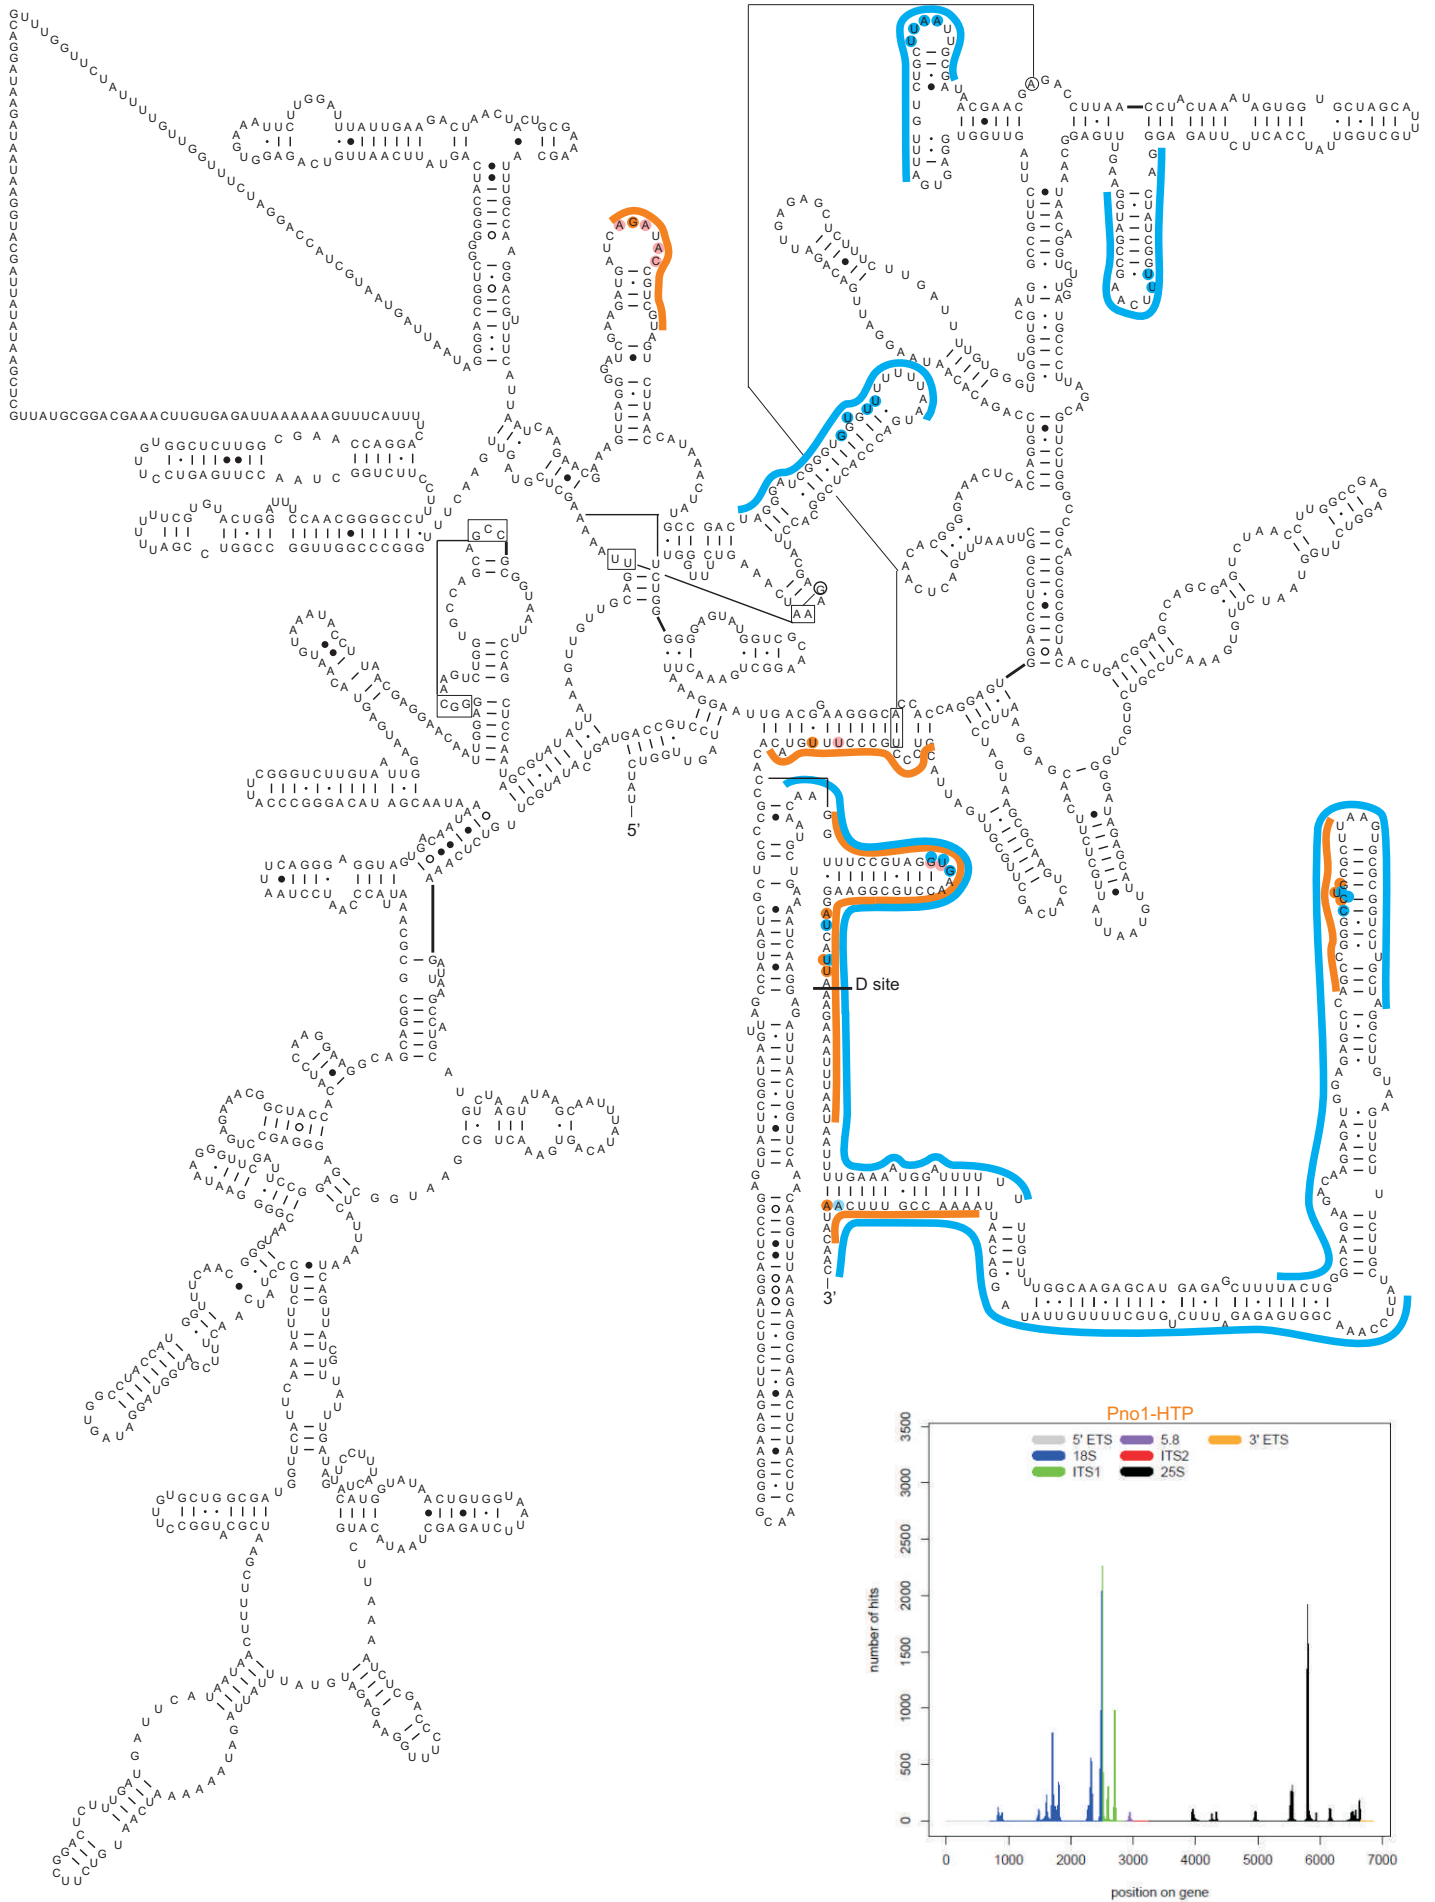

Supplement: supp_gku878_nar-01553-r-2014-File008.pdf [file supp_gku878_nar-01553-r-2014-File008.pdf]
